# Supplementary material for: Intestinal iron bio-accessibility changes by Lignin and the subsequent impact on cell metabolism and intestinal microbiome communities
Source: Royal Society of Chemistry journal article supplement (doi:10.1039/d2fo03807b), 2023-01-01

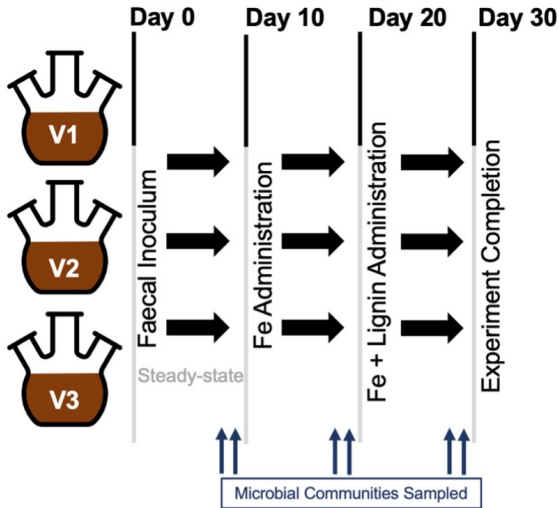

Supplement: d2fo03807b4.pdf [file d2fo03807b4.pdf]
